# Supplementary material for: Insights into the effects of steam on propane dehydrogenation over a Pt/Al2O3 catalyst
Source: Royal Society of Chemistry journal article supplement (doi:10.1039/c5cy00230c), 2015-01-01
Supplement: c5cy00230c1.pdf [file c5cy00230c1.pdf]

## Insights into the effects of steam on propane dehydrogenation over Pt/Al<sub>2</sub>O<sub>3</sub> catalyst

Yu-Ling Shan<sup>1</sup>, Yi-An Zhu<sup>1</sup>, Zhi-Jun. Sui<sup>1,\*</sup>, De Chen<sup>2</sup> and  
Xing-Gui Zhou<sup>1</sup>

<sup>1</sup>State Key Laboratory of Chemical Engineering, East China University of  
Science and Technology, Shanghai 200237, P. R. China

<sup>2</sup>Department of Chemical Engineering, Norwegian University of Science and  
Technology, N-7491, Trondheim, Norway

\*Corresponding author: zhjsui@ecust.edu.cn

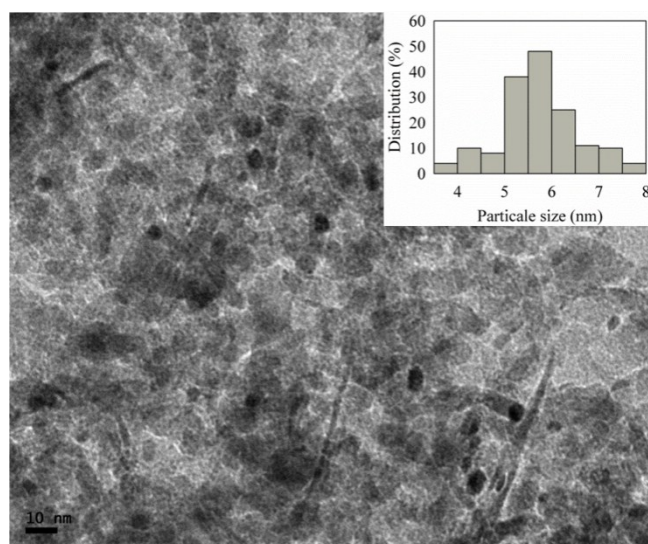

Fig. S1. TEM image of prepared Pt/γ-Al<sub>2</sub>O<sub>3</sub> catalyst, the in-set shows the particle size distribution of Pt.

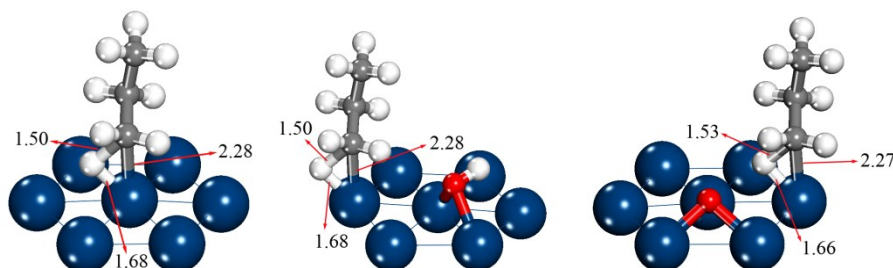

Fig. S2. Transition states structures of propane dehydrogenation at a) clean Pt(111) surface, OH\*Pt(111) surface and O\*Pt(111) surface.

**Table S1 Adsorption energies and geometries of hydroxyl and oxygen atom on Pt(111) surface**

| species          | Adsorption Sites | $\Delta E_{\text{ads}}$ (eV) |
|------------------|------------------|------------------------------|
| Hydroxyl (-OH)   | Atop             | -2.25                        |
|                  | Bridge           | -2.34                        |
| Oxygen atom (-O) | Atop             | -3.13                        |
|                  | Bridge           | -4.40                        |
|                  | Fcc              | -4.41                        |
